# Supplementary material for: Systematic review of patients' participation in and experiences of technology-based monitoring of mental health symptoms in the community
Source: PubMed Central journal article supplement — BMJ Open. 2016 Jun 21;6(6):e008362. doi: 10.1136/bmjopen-2015-008362 (PMC4916567; doi:10.1136/bmjopen-2015-008362), 2016-06-21
Supplement: bmjopen-2015-008362supp1.pdf [file bmjopen-2015-008362supp1.pdf]

## Online supplementary file 1

### ELECTRONIC SEARCH TERMS

#### OVID Search Strategy (Medline, PsycINFO, Embase)

1. symptom monitoring.mp.
2. symptom reporting.mp.
3. \*Monitoring, Ambulatory/ or telemonitoring.mp.
4. momentary assessment.mp. or exp Questionnaires/
5. experience sampling.mp.
6. experience sampling methods.mp.
7. ambulatory assessment.mp.
8. telehealth.mp. or \*Telemedicine/
9. ehealth.mp.
10. ecological momentary assessment.mp.
11. self monitoring.mp.
12. 1 or 2 or 3 or 4 or 5 or 6 or 7 or 8 or 9 or 10 or 11
13. mental health condition.mp. or exp Mental Health Services/
14. mental health.mp.
15. \*Mental Disorders/
16. Psychiatry/
17. mental illness.mp.
18. 13 or 14 or 15 or 16 or 17
19. electronic mail/ or text messaging/
20. Computers, Handheld/
21. \*Cellular Phone/ or mobile technology.mp.
22. \*Internet/
23. smartphone.mp.
24. online.mp.
25. \*Computers/
26. 19 or 20 or 21 or 22 or 23 or 24 or 25
27. 12 and 18 and 26

### EXTRACTION DATABASE DETAILS

Details relating to the study (research design, country, study setting); participant demographics (diagnosis, gender, age, education level); monitoring intervention (aim, if the monitoring is part of another intervention, domains monitored, use of validated questionnaire for monitoring, prompting, type of technology used for prompting, type of technology used for monitoring, frequency of monitoring, length of monitoring, feedback type and recipients); measure of patient experience (rate of participation, findings from qualitative and quantitative evaluations) were entered into an excel spreadsheet. To calculate the rates of participation the number of potential and actual symptom monitoring instances was documented for completers and non-completers, where possible. The average number of responses for the whole sample was calculated by dividing the potential number of responses and representing this as a percentage.
