# Supplementary material for: Systematic review of patients' participation in and experiences of technology-based monitoring of mental health symptoms in the community
Source: PubMed Central journal article supplement — BMJ Open. 2016 Jun 21;6(6):e008362. doi: 10.1136/bmjopen-2015-008362 (PMC4916567; doi:10.1136/bmjopen-2015-008362), 2016-06-21
Supplement: bmjopen-2015-008362supp2.pdf [file bmjopen-2015-008362supp2.pdf]

Online supplementary file 2: Summary of papers included in the systematic review

|                                                     | Population                    | Sample size (n) | Name and purpose of monitoring                                            | Technology              | What reported                                                                                                                                                      | Validated questionnaire used | Type of schedule, frequency and prompting                                                                       | Momentary or Retrospective | Duration                                                   | Feedback                                              | Automated feedback                                                             | Findings                                                                                      |
|-----------------------------------------------------|-------------------------------|-----------------|---------------------------------------------------------------------------|-------------------------|--------------------------------------------------------------------------------------------------------------------------------------------------------------------|------------------------------|-----------------------------------------------------------------------------------------------------------------|----------------------------|------------------------------------------------------------|-------------------------------------------------------|--------------------------------------------------------------------------------|-----------------------------------------------------------------------------------------------|
| Kimhy & Corcoran (2008) [1] USA Case study          | Schizophrenia (sub threshold) | 1               | No name given<br><br>To support individual face-to-face CBT               | Software - PDA          | Current thoughts, mood, behaviour, social context                                                                                                                  | No                           | Random schedule<br>10 times daily<br>Between 10.00-00.00<br>Beep prompted<br>180 seconds to respond             | Momentary                  | 3 day periods, in treatment months<br>3,5,8 (total 9 days) | Summary graphs for clinician                          | No                                                                             | N/a (feasibility case study)                                                                  |
| Burns et al., (2011) [2] USA Single arm pilot study | Depression                    | 8               | Mobilyze!<br><br>To support internet based behavioural activation therapy | Software - mobile phone | Mood, intensity of discrete emotions, fatigue, pleasure, sense of accomplishment, concentration and engagement, perceived control over current activities, context | No                           | Random schedule<br>5 times a day<br>Between 07.00-22.00<br>Software prompted                                    | Momentary                  | 8 weeks                                                    | Graphs for patient and online coach                   | Patient Reinforce improvement or suggest using tool (website) if deterioration | n/a (pilot study)                                                                             |
| Kauer et al., (2012) [3,4] [3,4] Australia RCT      | Depression (sub threshold)    | 69              | Mobilitytype<br><br>To support treatment management                       | Software - mobile phone | Current activity, stress, mood, alcohol use, cannabis use, sleep, diet, exercise                                                                                   | No                           | Random schedule<br>4 times a day<br>Intervals at<br>08:00-10.59;<br>11.00-15.29;<br>15.30:19:59;<br>20.00-22.00 | Momentary                  | 2-4 weeks                                                  | Summary graphs for clinicians and report for patients | No                                                                             | Significant finding (confidence intervals) on depression mediated by improved emotional self- |

|                                                            |            |    |                                                                                    |                |                                                                                                                                |    |                                                                                                                                                                         |                             |                           |                        |                                             |                                                                                                            |
|------------------------------------------------------------|------------|----|------------------------------------------------------------------------------------|----------------|--------------------------------------------------------------------------------------------------------------------------------|----|-------------------------------------------------------------------------------------------------------------------------------------------------------------------------|-----------------------------|---------------------------|------------------------|---------------------------------------------|------------------------------------------------------------------------------------------------------------|
|                                                            |            |    |                                                                                    |                |                                                                                                                                |    | Beep prompted<br>Reminder beep after 5 minutes                                                                                                                          |                             |                           |                        |                                             | awareness                                                                                                  |
| Kramer (2014) [5]<br>Netherlands<br>RCT                    | Depression | 33 | No name given<br><br>As a therapeutic add-on treatment to increase positive affect | Software-PDA   | Current affect, context and activities                                                                                         | No | Random schedule<br>10 times a day<br>Intervals of 90 minutes between 07.30-22.30<br>Beep prompted                                                                       | Momentary                   | 3 day periods for 6 weeks | Patient receive graphs | No                                          | Significant finding (p-value) on weekly depression symptoms over time (both patient and observer measures) |
| Newman et al., (1999) [6]<br>USA<br>Single arm pilot study | Anxiety    | 3  | No name given<br><br>To support face-to-face group CBT                             | Software - PDA | Current anxiety, highest anxiety level, average anxiety, number of acute anxiety, % time spent worrying, current anxiety cues, | No | Fixed schedule<br>5 times a day at 08:00; 12:00; 16:00; 20:00; 23:00<br>Beep prompted<br><br>For two days fixed schedule<br>Hourly between 08:00-23:00<br>Beep prompted | Momentary and retrospective | 13 weeks                  | Summary for clinician  | No                                          | n/a (pilot study)                                                                                          |
| Wenze (2014) [7]<br>USA<br>Single arm                      | Bipolar    | 14 | No name given<br><br>To improve                                                    | Software - PDA | Mood, mood change, sleep disturbance, psychomotor                                                                              | No | Fixed schedule<br>2 times a day at                                                                                                                                      | Momentary and retrospective | 2 weeks                   | No                     | Patient receives feedback as instruction or | n/a (pilot study)                                                                                          |

|                                                                    |               |    |                                                                  |                             |                                                                                                                                     |    |                                                                                                                         |                             |          |                                                         |                                                                                                                     |                                                              |
|--------------------------------------------------------------------|---------------|----|------------------------------------------------------------------|-----------------------------|-------------------------------------------------------------------------------------------------------------------------------------|----|-------------------------------------------------------------------------------------------------------------------------|-----------------------------|----------|---------------------------------------------------------|---------------------------------------------------------------------------------------------------------------------|--------------------------------------------------------------|
| pilot study                                                        |               |    | treatment adherence                                              |                             | agitation/retardation, anxiety, perceptual disturbances, suicidality, daily appointments, medication, adherence, treatment concerns |    | 10:00; 17:00<br>Beep prompted                                                                                           |                             |          |                                                         | tips, if they indicate a problem                                                                                    |                                                              |
| Depp et al (2010) [project 1] [8]<br>USA<br>Single arm pilot study | Bipolar       | 10 | Personalised Real Time intervention for Stabilising Mood (PRISM) | Software-PDA                | Mood state, illness triggers                                                                                                        | No | Random schedule 4 times a day                                                                                           | Momentary                   | 2 weeks  | No                                                      | Patient receives preselected self-management strategies in response to exacerbation in symptoms or illness triggers | n/a (pilot study)                                            |
|                                                                    |               |    | To support individual face-to-face psychoeducation               |                             |                                                                                                                                     |    |                                                                                                                         |                             |          |                                                         |                                                                                                                     |                                                              |
| Depp (2015) [9]<br>USA<br>RCT                                      | Bipolar       | 51 | PRISM                                                            | Website (for use on mobile) | Activity, location, social context, current mood, intention to try/use of suggested strategy, early warning signs                   | No | Random schedule 2 times a day morning and evening within 3-4hour blocks<br>Software prompted, reminder after 15 minutes | Momentary and retrospective | 10 weeks | Graphical feedback on mood items available for patients | Patient receives predefined (personal) implementation intentions in response to mood and early warning sign ratings | Significant finding (p-value) on depressive symptom severity |
| Granholtm et al., (2012) [10]                                      | Schizophrenia | 55 | MATS (mobile assessment and treatment)                           | SMS                         | Medication compliance, socialisation,                                                                                               | No | Fixed schedule<br>Daily within                                                                                          | Momentary                   | 12 weeks | No                                                      | Personalised information to challenge                                                                               | n/a (pilot study)                                            |

|                                                                    |            |    |                                                                                                                                          |         |                                                                                         |                                                                   |                                                                                                   |                   |                 |                                        |                                                                                                  |                                                                                                            |
|--------------------------------------------------------------------|------------|----|------------------------------------------------------------------------------------------------------------------------------------------|---------|-----------------------------------------------------------------------------------------|-------------------------------------------------------------------|---------------------------------------------------------------------------------------------------|-------------------|-----------------|----------------------------------------|--------------------------------------------------------------------------------------------------|------------------------------------------------------------------------------------------------------------|
| USA<br>Single arm<br>pilot study                                   |            |    | for<br>schizophrenia<br>)<br><br>To support<br>treatment<br>management                                                                   |         | Auditory<br>hallucinations                                                              |                                                                   | selected two<br>hour window<br>SMS<br>prompted                                                    |                   |                 |                                        | thoughts,<br>behavioural<br>coping or<br>behavioural<br>experiment                               |                                                                                                            |
| Drake et<br>al., (2013)<br>[11]<br>UK<br>Single arm<br>pilot study | Depression | 20 | Moodscope<br><br>To stabilise<br>and improve<br>mood                                                                                     | Website | Mood                                                                                    | Adapted<br>version of<br>Positive and<br>Negative<br>Affect scale | Fixed<br>schedule<br>Daily<br>Unprompted                                                          | Momentary         | 13<br>weeks     | Summary<br>graphs for<br>patient       | Two<br>paragraph<br>supportive<br>summation<br>for patient<br>and optional<br>nominated<br>buddy | n/a (pilot<br>study)                                                                                       |
| Miklowitz<br>(2012) [12]<br>UK<br>Single arm<br>pilot study        | Bipolar    | 19 | True Colours<br>(Facilitated<br>Integrated<br>Mood<br>Management)<br><br>To support<br>individual<br>face-to-face<br>psychoeducati<br>on | Email   | Daily mood and<br>sleep                                                                 |                                                                   | Fixed<br>schedule<br>Daily<br>Email<br>prompted                                                   | Retrospecti<br>ve | 5 or 6<br>weeks | Graphs for<br>therapist<br>and patient | No                                                                                               | n/a (pilot<br>study)                                                                                       |
| Lieberman<br>et al.,<br>(2010) [13]<br>USA<br>RCT                  | Bipolar    | 23 | Moodchart<br><br>To support<br>treatment<br>management                                                                                   | Email   | Mood. Optional<br>domains:, sleep,<br>irritability,<br>anxiety, weight,<br>daily events | NIMH Life<br>Chart<br>Methodolog<br>y                             | Fixed<br>schedule<br>Daily<br>(except for<br>weight<br>monitored<br>monthly)<br>Email<br>prompted | Retrospecti<br>ve | 13<br>weeks     | Graphs for<br>patient                  | No                                                                                               | Significant<br>finding (p-<br>value)<br>online chart<br>rated<br>significantly<br>more than<br>paper chart |
| Hareva<br>(2009) [14]<br>Japan<br>Single arm                       | Depression | 1  | No name<br>given<br><br>To support                                                                                                       | Website | Depression                                                                              | No                                                                | Fixed<br>schedule<br>Daily<br>SMS                                                                 | Retrospecti<br>ve | 56<br>weeks     | Graphs for<br>clinician                | Warning for<br>patient and<br>clinician                                                          | n/a (pilot<br>study)                                                                                       |

| pilot study                                                    |                                                                 |     | treatment management                                                     |                                                                      |                                                                                                                                 |                                 | prompted                                                    |               |             |                                                                           |                                                                                                                                |                                                  |
|----------------------------------------------------------------|-----------------------------------------------------------------|-----|--------------------------------------------------------------------------|----------------------------------------------------------------------|---------------------------------------------------------------------------------------------------------------------------------|---------------------------------|-------------------------------------------------------------|---------------|-------------|---------------------------------------------------------------------------|--------------------------------------------------------------------------------------------------------------------------------|--------------------------------------------------|
| Bauer et al., (2012) [15]<br>Germany<br>RCT                    | Eating Disorder                                                 | 82  | No name given<br><br>To support following inpatient discharge (unguided) | SMS                                                                  | Body dissatisfaction, frequency of binge eating, frequency of compensatory behaviours                                           | No                              | Fixed schedule<br>Daily SMS prompted                        | Retrospective | 16 weeks    | No                                                                        | Patient social support and interest in wellbeing, reinforce symptom improvement, reminder of CBT strategies learnt in hospital | Significant finding (p-value) on remission rates |
| Godleski et al., (2012) [16]<br>USA<br>Single arm pilot study  | Mixed: depression, substance use disorders, schizophrenia, PTSD | 76  | No name given<br><br>To support treatment management                     | Software - home telehealth unit                                      | Medication compliance, follow-up with clinicians, diagnostic specific symptoms, mood, substance use, activities of daily living | No                              | Fixed schedule<br>Daily Device LED light prompted           | Retrospective | 24 weeks    | Patient responses and predefined importance level available for clinician | Patient reinforce info about diagnosis, provide suggestions for therapeutic coping strategies                                  | n/a (pilot study)                                |
| Piette et al., (2013) [17]<br>USA<br>Retrospective observation | Depression                                                      | 442 | CarePartner<br><br>To support treatment management                       | Software - home telehealth unit interactive voice response via phone | Depressive symptoms and medication adherence                                                                                    | Patient Health Questionnaire -9 | Fixed schedule<br>3 times per week<br>Device sound prompted | Retrospective | 13-17 weeks | Report for clinician and optional automated feedback for family or friend | Advice on medication adherence, prompt clinical follow up to patient and clinician.                                            | n/a (retrospective study)                        |
| Smith et al., (2012) [18]<br>USA<br>Single arm pilot study     | Mixed: PTSD with TBI, incl. substance abuse and major           | 27  | No name given<br><br>To support following inpatient                      | SMS                                                                  | Assessment of functioning                                                                                                       | No                              | Fixed schedule<br>Every 3 days<br>SMS prompted              | Retrospective | 12 weeks    | No                                                                        | Notification of follow up warranted to patient, clinician, carer                                                               | n/a (pilot study)                                |

|                                                             | depressive disorder |    | discharge                                                                                |              |                                                                                       |                                                                              |                                             |               |                        |                                                             |                                                                                                                                |                           |
|-------------------------------------------------------------|---------------------|----|------------------------------------------------------------------------------------------|--------------|---------------------------------------------------------------------------------------|------------------------------------------------------------------------------|---------------------------------------------|---------------|------------------------|-------------------------------------------------------------|--------------------------------------------------------------------------------------------------------------------------------|---------------------------|
| Bopp et al., (2010) [19] UK<br>Longitudinal observational   | Bipolar             | 62 | Oxford University Symptom Monitoring System (SMS)<br><br>To support treatment management | SMS or email | Mania and depression                                                                  | Quick Inventory of Depressive Symptoms-Self report. Altman Self-rating Mania | Fixed schedule Weekly SMS or email prompted | Retrospective | indefinite (unlimited) | Graphs for clinician                                        | No                                                                                                                             | N/a (observational study) |
| Foster et al., (2011)[20] UK<br>Semi structured interviews  | Bipolar             | 29 | True Colours To support treatment management                                             | SMS or email | Mania and depression                                                                  | Quick Inventory of Depressive Symptoms-Self report. Altman Self-rating Mania | Fixed schedule Weekly SMS or email prompted | Retrospective | indefinite             | Graphs for clinician and patient                            | No                                                                                                                             | N/a (qualitative study)   |
| Bauer et al., (2006) [21] Germany<br>Single arm pilot study | Eating Disorder     | 33 | No name given<br><br>To support following inpatient discharge (unguided)                 | SMS          | Body dissatisfaction, frequency of binge eating, frequency of compensatory behaviours | No                                                                           | Fixed schedule Weekly SMS prompted          | Retrospective | 26 weeks               | No                                                          | Patient social support and interest in wellbeing, reinforce symptom improvement, reminder of CBT strategies learnt in hospital | n/a (pilot study)         |
| Robinson et al., (2006) [22] UK<br>Single arm pilot study   | Eating disorder     | 21 | Texting in bulimia nervosa<br><br>To support following outpatient discharge              | SMS          | Bulimic symptomatology and mood states                                                | No                                                                           | Fixed schedule Weekly SMS prompted          | Retrospective | 26 weeks               | Patients sent monthly postal feedback on course of symptoms | Patient received programmed, personally tailored feedback message - educate                                                    | n/a (pilot study)         |

|                             |                                 |    |                                                                                      |         |                                                                                                                                                                                 |                                                       |                                      |               |                  |                                          |                                                                                                                                                                           |                   |
|-----------------------------|---------------------------------|----|--------------------------------------------------------------------------------------|---------|---------------------------------------------------------------------------------------------------------------------------------------------------------------------------------|-------------------------------------------------------|--------------------------------------|---------------|------------------|------------------------------------------|---------------------------------------------------------------------------------------------------------------------------------------------------------------------------|-------------------|
|                             |                                 |    |                                                                                      |         |                                                                                                                                                                                 |                                                       |                                      |               |                  |                                          | participants about change in symptoms status, provide advice, generate support/concern                                                                                    |                   |
| Spaniel et al., (2008) [23] | Schizophrenia                   | 45 | ITAREPS (Information technology aided relapse prevention programme in schizophrenia) | SMS     | Early warning signs                                                                                                                                                             | Early Warning Signs Questionnaire-10, patient version | Fixed schedule Weekly SMS prompted   | Retrospective | 52 weeks         | Summary graphs for patient and clinician | Predefined score threshold triggers notification to clinician to increase medication                                                                                      | n/a (pilot study) |
|                             |                                 |    | To prevent relapse and hospitalisation                                               |         |                                                                                                                                                                                 |                                                       |                                      |               |                  |                                          |                                                                                                                                                                           |                   |
| Bauer et al., (2009) [24]   | Eating disorder (sub threshold) | 44 | ES [S] PIRIT                                                                         | Website | SEED (short evaluation of eating disorders) body dissatisfaction over concern with weight and shape, unbalanced nutrition and dieting, binge eating and compensatory behaviours | SEED                                                  | Fixed schedule Weekly Email prompted | Retrospective | up to individual | Report for online counsellor             | Provide social support, give advice on how to counteract negative developments in eating behaviour and attitude towards weight and shape for patient, automated alert for | n/a (pilot study) |

|                                                                      |                                                               |    |                                                                                                                             |         |                                                                                                                                 |    |                                            |               |                  |    |                                                                                                                                         |                                                                                                    |
|----------------------------------------------------------------------|---------------------------------------------------------------|----|-----------------------------------------------------------------------------------------------------------------------------|---------|---------------------------------------------------------------------------------------------------------------------------------|----|--------------------------------------------|---------------|------------------|----|-----------------------------------------------------------------------------------------------------------------------------------------|----------------------------------------------------------------------------------------------------|
|                                                                      |                                                               |    |                                                                                                                             |         |                                                                                                                                 |    |                                            |               |                  |    | online coach if scores deteriorate                                                                                                      |                                                                                                    |
| Gulec et al., (2011) [25]<br>Hungary<br>Single arm pilot study       | Eating Disorder (sub threshold)                               | 23 | EDINA (Hungarian for internet based aftercare for patients with eating disorders)<br><br>To support website based treatment | Website | Body dissatisfaction, frequency of binge eating, frequency of compensatory behaviours                                           | No | Fixed schedule<br>Weekly<br>Email prompted | Retrospective | 16 weeks         | No | Feedback including reinforcement advice for patient and online coach                                                                    | n/a (pilot study)                                                                                  |
| Gulec et al., (2014) [26]<br>Hungary<br>RCT                          | Bulimia Nervosa or Eating Disorder<br>Not otherwise specified | 52 | EDINA<br><br>To support website based treatment                                                                             | Website | Body dissatisfaction, frequency of binge eating, frequency of compensatory behaviours                                           | No | Fixed schedule<br>Weekly<br>Email prompted | Retrospective | 16 weeks         | No | Feedback including reinforcement advice for patient and online coach                                                                    | No significant effect (p-value) on eating disorder symptoms and attitudes between groups over time |
| Lindenberg et al, (2011) . [27]<br>Ireland<br>Single arm pilot study | Eating Disorder (sub threshold)                               | 92 | Appetite for life (translation of the E-SPIRIT) programme<br><br>To support website based stepped-care intervention         | Website | Body dissatisfaction, preoccupation with body weight and shape, balanced diet and nutrition, binges and compensatory behaviours | No | Fixed schedule<br>Weekly<br>Email prompted | Retrospective | up to individual | No | Feedback if score deteriorates: express concern and recommend strategies to counter ED behaviours, positive feedback - reinforcement of | n/a (pilot study)                                                                                  |



|                                                                         |                                                                                                              |    |                                                                                              |                         |                                                                                                     |    |                                                                                                                 |               |                                 |                                             |                                                                                                                              |                                                                                                                               |
|-------------------------------------------------------------------------|--------------------------------------------------------------------------------------------------------------|----|----------------------------------------------------------------------------------------------|-------------------------|-----------------------------------------------------------------------------------------------------|----|-----------------------------------------------------------------------------------------------------------------|---------------|---------------------------------|---------------------------------------------|------------------------------------------------------------------------------------------------------------------------------|-------------------------------------------------------------------------------------------------------------------------------|
|                                                                         |                                                                                                              |    |                                                                                              |                         |                                                                                                     |    |                                                                                                                 |               |                                 |                                             | improvement, healthy eating for patient and online coach                                                                     |                                                                                                                               |
| Macias et al., (2015) [28]<br>USA<br>Single arm pilot study             | Major psychiatric disorder (schizophrenia spectrum disorder, bipolar disorder, or major depressive disorder) | 11 | WellWave<br><br>To support app-based physical health intervention                            | Software – mobile phone | physical health, health control, voices, alcohol and marijuana use, positive and challenging events | No | Fixed schedule<br>Multiple times per week<br>Prompted                                                           | Retrospective | 4 weeks                         | Summaries and graphs available for patients | No                                                                                                                           | n/a (pilot study)                                                                                                             |
| Meglic et al., 2010 [29]<br>Slovenia<br>Non-randomised controlled trial | Depression or Mixed anxiety and depression                                                                   | 21 | Improvehealth.eu<br><br>To support website based treatment                                   | Website                 | Symptoms, suicidality, medication adherence and side effects                                        | No | Fixed schedule<br>Weekly (for weeks 0-9) and then monthly (weeks 10-23)<br>Unprompted<br>Prompted if incomplete | Retrospective | 24 weeks                        | Record of questionnaires                    | Tailored reinforcement message, including improvement or deterioration. Clinician receives tasks based on patient monitoring | Significant finding (p-value) on antidepressant adherence, non-significant (favouring the intervention) finding on depression |
| Matthews (2011) [30]<br>Ireland<br>Single arm pilot study               | Mixed (Depression anxiety, self-harm)                                                                        | 6  | MMD (The mobile mood diary)<br><br>To support individual face-to-face therapy (no treatment) | SMS                     | Mood, energy, sleep                                                                                 | No | Fixed schedule<br>Daily<br>Prompting optional                                                                   | Retrospective | Minimum one week but indefinite | Patient receives summary graphs             | No                                                                                                                           | n/a (pilot study)                                                                                                             |

| model)                                                              |                                                    |                        |              |                            |                                                                          |    |                                                                                         |               |                        |                                  |    |                                                                 |
|---------------------------------------------------------------------|----------------------------------------------------|------------------------|--------------|----------------------------|--------------------------------------------------------------------------|----|-----------------------------------------------------------------------------------------|---------------|------------------------|----------------------------------|----|-----------------------------------------------------------------|
| Proudfoot (2013) [31]<br>Australia<br>RCT                           | Depression (sub threshold)                         | 231                    | myCompass    | Website                    | Three symptoms of choice and context (what they are doing and who with)  | No | Fixed schedule<br>Daily<br>Prompting optional                                           | Retrospective | 7 weeks                | Patient graphs including context | No | Significant finding (p-value) on depression, anxiety and stress |
| Harrison et al., (2011) [32]<br>Australia<br>Single arm pilot study | Mixed: Depression /Anxiety /Stress (sub threshold) | 47                     | myCompass    | Website                    | Moods, intensity of discrete emotions, behaviours                        | No | Fixed schedule<br>More than once per week (recommended 3-4 times)<br>Prompting optional | Retrospective | 6 weeks                | Graphs for patients              | No | n/a (pilot study)                                               |
| Bauer et al., (2004) [33]<br>USA<br>Longitudinal observational      | Bipolar                                            | 96                     | ChronoRecord | Software - static computer | Mood, sleep, menstrual data, psychiatric medication, life events, weight | No | Fixed schedule<br>Daily (except for weight monitored weekly)<br>Unprompted              | Retrospective | 13 weeks               | Graphs for patient               | No | n/a (longitudinal observational study)                          |
| Bauer International [34-44]<br>Longitudinal observational           | Bipolar                                            | Varies between 234-513 | ChronoRecord | Software - static computer | Mood, sleep, menstrual data, psychiatric medication, life events, weight | No | Fixed schedule<br>Daily (except for weight monitored weekly)<br>Unprompted              | Retrospective | indefinite (unlimited) | Graphs for patient               | No | n/a (longitudinal observational study)                          |

|                                                              |                                                    |    |                                                                 |                                 |                                                                                     |    |                                        |               |          |                                                                           |                                                                                                                                                                                                                                                                 |                                                                |
|--------------------------------------------------------------|----------------------------------------------------|----|-----------------------------------------------------------------|---------------------------------|-------------------------------------------------------------------------------------|----|----------------------------------------|---------------|----------|---------------------------------------------------------------------------|-----------------------------------------------------------------------------------------------------------------------------------------------------------------------------------------------------------------------------------------------------------------|----------------------------------------------------------------|
| Shapiro et al., (2010) [45]<br>USA<br>Single arm pilot study | Eating Disorder                                    | 31 | No name given<br><br>To support face-to-face group CBT          | SMS                             | Number of binges and purges, strength of peak binge urge and purge urge             | No | Fixed schedule<br>Daily<br>Unprompted  | Retrospective | 24 weeks | No                                                                        | Specific feedback on data and suggestions of skills to use to patient                                                                                                                                                                                           | n/a (pilot study)                                              |
| Pratt(2014) [46]<br>USA<br>Single arm pilot study            | Severe Mental Illness with psychiatric instability | 38 | Health Buddy<br><br>To prevent relapse and hospitalisation      | Software – home telehealth unit | Key symptoms                                                                        | No | Fixed schedule<br>Daily<br>Unprompted  | Retrospective | 26 weeks | Patient responses and predefined importance level available for clinician | Patient receives instructions for seeking treatment if scores indicate deterioration or relapse, nurse receives categories of high, medium and low risk patients with standard protocol (call to discuss, call to prompt coping, call with advice respectively) | n/a (pilot study)                                              |
| Hunkeler et al., (2012) [47]<br>USA<br>RCT                   | Depression                                         | 51 | eCare for Moods<br><br>To support treatment website based self- | Website                         | Depression, disability, medication adherence, side effects and alcohol and drug use | No | Fixed schedule<br>Weekly<br>Unprompted | Retrospective | 52 weeks | Graphs for patient and clinician                                          | Alerts for clinician based on patients monitoring (emergency alerts, urgent                                                                                                                                                                                     | Significant finding (p-value) on depression severity over time |

| management                                                                    |                     |     |                                                                      |         |                                                                                                                   |                                |                                                 |               |          |                                     |    | alerts,<br>notifications)                                                                                                                                                       |
|-------------------------------------------------------------------------------|---------------------|-----|----------------------------------------------------------------------|---------|-------------------------------------------------------------------------------------------------------------------|--------------------------------|-------------------------------------------------|---------------|----------|-------------------------------------|----|---------------------------------------------------------------------------------------------------------------------------------------------------------------------------------|
| Hetrick et al., (2015) [48]<br>Australia<br>Single arm pilot study            | Moderate depression | 28  | No name given<br>To support treatment management                     | Website | Depression                                                                                                        | Patient Health Questionnaire-9 | Fixed schedule<br>Weekly<br>Unprompted          | Retrospective | 12 weeks | Graphs for clinician                | No | n/a (pilot study)                                                                                                                                                               |
| Carrard et al., (2011) [49]<br>Switzerland<br>Non randomised controlled trial | Eating Disorder     | 22  | No name given<br><br>To support website based self-help intervention | Website | Meals, binges, binge triggers, pleasure derived from eating, physical activity, strategies used to prevent binges | No                             | Fixed schedule<br>Daily<br>Unclear if prompted  | Retrospective | 26 weeks | Charts for patient and online coach | No | Significant finding (p-value) on subscales of shape concern and hunger but non-significant findings on other subscales or total scales of eating disorder questionnaires or BMI |
| Carrard et al., (2011) [50]<br>Switzerland<br>RCT                             | Eating Disorder     | 74  | No name given<br><br>To support website based self-help intervention | Website | Meals, binges, binge triggers, pleasure derived from eating, physical activity, strategies used to prevent binges | No                             | Fixed schedule<br>Daily<br>Unclear if prompted  | Retrospective | 26 weeks | Charts for patient and online coach | No | Significant finding (p-value) on bulimia subscale (primary outcome)                                                                                                             |
| Carrard et al.,(2011) [51,52]<br>Europe<br>Single arm                         | Eating Disorder     | 127 | No name given<br><br>To support website based                        | Website | Meals, Bingeing and compensatory behaviours, triggers                                                             | No                             | Fixed schedule<br>Weekly<br>Unclear if prompted | Retrospective | 17 weeks | Charts for patient and online coach | No | n/a (pilot study)                                                                                                                                                               |

| pilot study                                                     |                                 |    | self-help intervention                                                   |         |                                                                                                                        |    |                                                 |               |          |                                                         |    |                                                                            |
|-----------------------------------------------------------------|---------------------------------|----|--------------------------------------------------------------------------|---------|------------------------------------------------------------------------------------------------------------------------|----|-------------------------------------------------|---------------|----------|---------------------------------------------------------|----|----------------------------------------------------------------------------|
| Jacobi et al., (2012) [53]<br>Germany<br>RCT                    | Eating Disorder (sub threshold) | 64 | Student Bodies™<br><br>To support website based self-help intervention   | Website | Symptoms                                                                                                               | No | Fixed schedule<br>Weekly<br>Unclear if prompted | Retrospective | 8 weeks  | Online coach views and provides individualised feedback | No | Significant finding (confidence interval) on eating disorder questionnaire |
| Ohlmer et al., (2013) [54]<br>Germany<br>Single arm pilot study | Eating Disorder (sub threshold) | 36 | Student Bodies AN<br><br>To support website based self-help intervention | Website | Number of meals and snacks, restrained and binge eating, avoided foods, purging behaviours, exercising, current weight | No | Fixed schedule<br>Weekly<br>Unclear if prompted | Retrospective | 10 weeks | Online moderator gives individual weekly feedback       | No | n/a (pilot study)                                                          |

1. Kimhy D, Corcoran C. Use of Palm computer as an adjunct to cognitive-behavioural therapy with an ultra-high-risk patient: a case report. *Early Interv Psychiatry* 2008;2(4):234-41.
2. Burns MN, Begale M, Duffecy J, Gergle D, Karr CJ, Giangrande E, et al. Harnessing Context Sensing to Develop a Mobile Intervention for Depression. *J Med Internet Res* 2011;13(3).
3. Kauer SD, Reid SC, Crooke AH, Khor A, Hearps SJ, Jorm AF, et al. Self-monitoring using mobile phones in the early stages of adolescent depression: randomized controlled trial. *J Med Internet Res* 2012;14(3):15-31.
4. Reid SC, Kauer SD, Hearps SJC, Crooke AHD, Khor AS, Sanci LA, et al. A mobile phone application for the assessment and management of youth mental health problems in primary care: a randomised controlled trial. *BMC Fam Pract* 2011;12.

5. Kramer I, Simons CJ, Hartmann JA, Menne-Lothmann C, Viechtbauer W, Peeters F, et al. A therapeutic application of the experience sampling method in the treatment of depression: a randomized controlled trial. *World Psychiatry* 2014;13(1):68-77.
6. Newman MG, Consoli AJ, Taylor CB. A palmtop computer program for the treatment of generalized anxiety disorder. *Behav Modif* 1999;23(4):597-619.
7. Wenze SJ, Armev MF, Miller IW. Feasibility and Acceptability of a Mobile Intervention to Improve Treatment Adherence in Bipolar Disorder: A Pilot Study. *Behav Modif* 2014;38(4):497-515.
8. Depp CA, Mausbach B, Granholm E, Cardenas V, Ben-Zeev D, Patterson TL, et al. Mobile interventions for severe mental illness: design and preliminary data from three approaches. *J Nerv Ment Dis* 2010;198(10):715-21.
9. Depp CA, Ceglowski J, Wang VC, Yaghouti F, Mausbach BT, Thompson WK, et al. Augmenting psychoeducation with a mobile intervention for bipolar disorder: A randomized controlled trial. *J Affect Disord* 2015;174:23-30.
10. Granholm E, Ben-Zeev D, Link PC, Bradshaw KR, Holden JL. Mobile Assessment and Treatment for Schizophrenia (MATS): A Pilot Trial of An Interactive Text-Messaging Intervention for Medication Adherence, Socialization, and Auditory Hallucinations. *Schizophr Bull* 2012;38(3):414-25.
11. Drake G, Csipke E, Wykes T. Assessing your mood online: acceptability and use of Moodscope. *Psychol Med* 2013;43(7):1455-64.
12. Miklowitz DJ, Price J, Holmes EA, Rendell J, Bell S, Budge K, et al. Facilitated integrated mood management for adults with bipolar disorder. *Bipolar Disord* 2012;14(2):185-97.
13. Lieberman DZ, Kelly TF, Douglas L, Goodwin FK. A randomized comparison of online and paper mood charts for people with bipolar disorder. *J Affect Disord* 2010;124(1):85-89.
14. Hareva DH. Supportive intervention using a mobile phone in behavior modification. *Acta Med Okayama* 2009;63(2):113-20.
15. Bauer S, Okon E, Meermann R, Kordy H. Technology-Enhanced Maintenance of Treatment Gains in Eating Disorders: Efficacy of an Intervention Delivered via Text Messaging. *J Consult Clin Psychol* 2012;80(4):700-06.
16. Godleski L, Cervone D, Vogel D, Rooney M. Home telemental health implementation and outcomes using electronic messaging. *J Telemed Telecare* 2012;18(1):17-9.
17. Piette JD, Rosland AM, Marinec NS, Striplin D, Bernstein SJ, Silveira MJ. Engagement With Automated Patient Monitoring and Self-Management Support Calls Experience With a Thousand Chronically Ill Patients. *Med Care* 2013;51(3):216-23.
18. Smith B, Harms WD, Burrell S, Korda H, Rosen H, Davis J. Enhancing behavioral health treatment and crisis management through mobile ecological momentary assessment and SMS messaging. *Health Informatics J* 2012;18(4):294-308.
19. Bopp JM, Miklowitz DJ, Goodwin GM, Stevens W, Rendell JM, Geddes JR. The longitudinal course of bipolar disorder as revealed through weekly text messaging: a feasibility study. *Bipolar Disord* 2010;12(3):327-34.
20. Foster J, Price J, Budge K, Bell S, Goodwin G, Geddes J. Refining a mood monitoring system for bipolar disorder: user experiences of True Colours [poster abstract]. *Bipolar Disord* 2011;13(s1):45-45.
21. Bauer S, Hagel J, Okon E, Meermann R, Kordy H. SMS in der nachstationären Betreuung von Patientinnen mit Bulimia nervosa [Experience with the application of the short message service (SMS) in the aftercare of patients with bulimia nervosa]. *Psychodynamische Psychotherapie* 2006;5(3):127-36.

22. Robinson S, Perkins S, Bauer S, Hammond N, Treasure J, Schmidt U. Aftercare intervention through text messaging in the treatment of bulimia nervosa— Feasibility pilot. *Int J Eat Disord* 2006;39(8):633-38.
23. Spaniel F, Vohlidka P, Hrdlicka J, Kozeny J, Novak T, Motlova L, et al. ITAREPS: Information technology aided relapse prevention programme in schizophrenia. *Schizophr Res* 2008;98(1-3):312-17.
24. Bauer S, Moessner M, Wolf M, Haug S, Kordy H. ES S PRIT - an Internet-based programme for the prevention and early intervention of eating disorders in college students. *Br J Guid Couns* 2009;37(3):327-36.
25. Gulec H, Moessner M, Mezei A, Kohls E, Túry F, Bauer S. Internet-based maintenance treatment for patients with eating disorders. *Prof Psychol Res Pr* 2011;42(6):479-86.
26. Gulec H, Moessner M, Túry F, Fiedler P, Mezei A, Bauer S. A randomized controlled trial of an Internet-based posttreatment care for patients with eating disorders. *Telemedicine and e-Health* 2014;20(10):916-22.
27. Lindenberg K, Moessner M, Harney J, McLaughlin O, Bauer S. E-health for individualized prevention of eating disorders. *Clin Pract Epidemiol Ment Health* 2011;7:74-83.
28. Macias C, Panch T, Hicks YM, Scolnick JS, Weene DL, Öngür D, et al. Using smartphone apps to promote psychiatric and physical well-being. *Psychiatric Quarterly* 2015.
29. Meglic M, Furlan M, Kuzmanic M, Kozel D, Baraga D, Kuhar I, et al. Feasibility of an eHealth service to support collaborative depression care: results of a pilot study. *J Med Internet Res* 2010;12(5).
30. Matthews M, Doherty G. In the mood: engaging teenagers in psychotherapy using mobile phones. *Proceedings of the Conference on Human Factors in Computing Systems* 2011:2947-56.
31. Proudfoot J, Clarke J, Birch MR, Whitton AE, Parker G, Manicavasagar V, et al. Impact of a mobile phone and web program on symptom and functional outcomes for people with mild-to-moderate depression, anxiety and stress: a randomised controlled trial. *BMC Psychiatry* 2013;13.
32. Harrison V, Proudfoot J, Wee PP, Parker G, Pavlovic DH, Manicavasagar V. Mobile mental health: Review of the emerging field and proof of concept study. *J Ment Health* 2011;20(6):509-24.
33. Bauer M, Grof P, Gyulai L, Rasgon N, Glenn T, Whybrow PC. Using technology to improve longitudinal studies: self-reporting with ChronoRecord in bipolar disorder. *Bipolar Disord* 2004;6(1):67-74.
34. Bauer M, Grof P, Rasgon NL, Marsh W, Munoz RA, Sagduyu K, et al. Self-reported data from patients with bipolar disorder: Impact on minimum episode length for hypomania. *J Affect Disord* 2006;96(1-2):101-05.
35. Bauer M, Rasgon N, Grof P, Glenn T, Lapp M, Marsh W, et al. Do antidepressants influence mood patterns? A naturalistic study in bipolar disorder. *Eur Psychiatry* 2006;21(4):262-69.
36. Bauer M, Glenn T, Grof P, Pfennig A, Rasgon NL, Marsh W, et al. Self-reported data from patients with bipolar disorder: Frequency of brief depression. *J Affect Disord* 2007;101(1-3):227-33.
37. Bauer M, Glenn T, Grof P, Rasgon NL, Marsh W, Sagduyu K, et al. Frequency of subsyndromal symptoms and employment status in patients with bipolar disorder. *Soc Psychiatry Psychiatr Epidemiol* 2009;44(7):515-22.

38. Bauer M, Glenn T, Grof P, Rasgon NL, Marsh W, Sagduyu K, et al. Relationship between adjunctive medications for anxiety and time spent ill in patients with bipolar disorder. *Int J Psychiatry Clin Pract* 2009;13(1):70-77.
39. Bauer M, Glenn T, Grof P, Marsh W, Sagduyu K, Alda M, et al. The association between concurrent psychotropic medications and self-reported adherence with taking a mood stabilizer in bipolar disorder. *Hum Psychopharmacol* 2010;25(1):47-54.
40. Bauer M, Glenn T, Rasgon N, Marsh W, Sagduyu K, Munoz R, et al. Association between age of onset and mood in bipolar disorder: comparison of subgroups identified by cluster analysis and clinical observation. *J Psychiatr Res* 2010;44(16):1170-75.
41. Bauer M, Glenn T, Rasgon N, Marsh W, Sagduyu K, Munoz R, et al. Association between median family income and self-reported mood symptoms in bipolar disorder. *Compr Psychiatry* 2011;52(1):17-25.
42. Bauer M, Glenn T, Rasgon N, Marsh W, Sagduyu K, Grof P, et al. Decreasing the minimum length criterion for an episode of hypomania: evaluation using self-reported data from patients with bipolar disorder. *Eur Arch Psychiatry Clin Neurosci* 2011;261(5):341-47.
43. Bauer M, Glenn T, Keil M, Bauer R, Marsh W, Grof P, et al. Brief depressive symptoms in patients with bipolar disorder: analysis of long-term self-reported data. *Aust N Z J Psychiatry* 2012;46(11):1068-78.
44. Bauer M, Glenn T, Alda M, Sagduyu K, Marsh W, Grof P, et al. Drug treatment patterns in bipolar disorder: analysis of long-term self-reported data. *Int J Bipolar Disord* 2013;1(5).
45. Shapiro JR, Bauer S, Andrews E, Pisetsky E, Bulik-Sullivan B, Hamer RM, et al. Mobile Therapy: Use of Text-Messaging in the Treatment of Bulimia Nervosa. *Int J Eat Disord* 2010;43(6):513-19.
46. Pratt SI, Naslund JA, Wolfe RS, Santos M, Bartels SJ. Automated telehealth for managing psychiatric instability in people with serious mental illness. *J Ment Health* 2014(0):1-5.
47. Hunkeler EM, Hargreaves WA, Fireman B, Terdiman J, Meresman JF, Porterfield Y, et al. A Web-delivered care management and patient self-management program for recurrent depression: a randomized trial. *Psychiatr Serv* 2012;63(11):1063-71.
48. Hetrick SE, Delloso MK, Simmons MB, Phillips L. Development and pilot testing of an online monitoring tool of depression symptoms and side effects for young people being treated for depression. *Early Interv Psychiatry* 2015;9(1):66-69.
49. Carrard I, Crépin C, Rouget P, Lam T, Martial VdL, Golay A. Acceptance and efficacy of a guided Internet self-help treatment program for obese patients with binge eating disorder. *Clin Pract Epidemiol Ment Health* 2011;7:8-18.
50. Carrard I, Crépin C, Rouget P, Lam T, Golay A, Van der Linden M. Randomised controlled trial of a guided self-help treatment on the Internet for binge eating disorder. *Behav Res Ther* 2011;49(8):482-91.
51. Carrard I, Fernandez-Aranda F, Lam T, Nevoonen L, Liwowsky I, Volkart A, et al. Evaluation of a guided internet self-treatment programme for bulimia nervosa in several European countries. *Eur Eat Disord Rev* 2011;19(2):138-49.
52. Carrard I, Rouget P, Fernández-Aranda F, Volkart A-C, Damoiseau M, Lam T. Evaluation and deployment of evidence based patient self-management support program for bulimia nervosa. *Int J Med Inf* 2006;75(1):101-09.
53. Jacobi C, Völker U, Trockel MT, Taylor CB. Effects of an Internet-based intervention for subthreshold eating disorders: A randomized controlled trial. *Behav Res Ther* 2012;50(2):93-99.
54. Ohlmer R, Jacobi C, Taylor CB. Preventing symptom progression in women at risk for AN: results of a pilot study. *Eur Eat Disord Rev* 2013;21(4):323-29.
