# Supplementary material for: Systematic review of patients' participation in and experiences of technology-based monitoring of mental health symptoms in the community
Source: PubMed Central journal article supplement — BMJ Open. 2016 Jun 21;6(6):e008362. doi: 10.1136/bmjopen-2015-008362 (PMC4916567; doi:10.1136/bmjopen-2015-008362), 2016-06-21
Supplement: bmjopen-2015-008362supp3.pdf [file bmjopen-2015-008362supp3.pdf]

Online supplementary file 3: Summary of patient experience of technology-based symptom monitoring

|                           |                  | Theme                                                                                      | Acceptability of intervention                                                                                   |      |                                                                                       |                                                       |                                         | Impact of intervention                                                                                                                    |                                                                   |
|---------------------------|------------------|--------------------------------------------------------------------------------------------|-----------------------------------------------------------------------------------------------------------------|------|---------------------------------------------------------------------------------------|-------------------------------------------------------|-----------------------------------------|-------------------------------------------------------------------------------------------------------------------------------------------|-------------------------------------------------------------------|
|                           |                  | Subtheme                                                                                   | General acceptability of symptom monitoring approach                                                            | Ease | Technology                                                                            | Frequency and duration                                | Helpfulness of feedback                 | Insight into health and management                                                                                                        | Relationships with others                                         |
| Study                     | Diagnosis        | Details of symptom monitoring                                                              |                                                                                                                 |      |                                                                                       |                                                       |                                         |                                                                                                                                           |                                                                   |
| Bauer et al., (2004) [1]  | Bipolar disorder | Unguided intervention to support treatment management<br>Daily unprompted                  |                                                                                                                 |      | Excellent technology                                                                  |                                                       |                                         |                                                                                                                                           |                                                                   |
| Foster et al., (2011) [2] |                  | Guided intervention to support treatment management<br>Weekly prompted                     | More flexibility to capture individual symptoms                                                                 | Ease | Liked choice of text or email                                                         | Liked frequency                                       | Graphs represented illness through time | Process improved insight but could be more responsive to alert clinician if high or missed scores. Better if tailored to illness symptoms | Improved interactions with clinician and fostered carer awareness |
| Wenze et al., (2014) [3]  |                  | Guided intervention to support treatment management<br>Fixed schedule twice daily prompted | Overall satisfaction and helpfulness though repetitive structure – change order of questions and expand content | Ease | Preferred smartphone to PDA. Technology not saving responses, not beeping loud enough | Increase frequency from daily to multiple times daily |                                         | Insight, active role and engagement. Increasing content, e.g. drugs, stress. Might differ depending on illness stage                      | Therapeutic alliance improved                                     |

|                               |                        |                                                                                               |                                       |                            |                                                                                                                                                                    |                                                 |                                                                               |
|-------------------------------|------------------------|-----------------------------------------------------------------------------------------------|---------------------------------------|----------------------------|--------------------------------------------------------------------------------------------------------------------------------------------------------------------|-------------------------------------------------|-------------------------------------------------------------------------------|
| Depp et al., (2010) [4]       |                        | Guided software (PDA) integrated intervention<br>Random schedule<br>Four times daily prompted |                                       |                            | Device easy to use but concerned how to explain it to others.                                                                                                      |                                                 | Increased awareness of emotions and greater use of self-management strategies |
| Depp et al., 2015 [5]         |                        | Guided website integrated intervention<br>Random schedule twice daily prompted                |                                       |                            | Ratings about device largely positive; participants would use it again, it was helpful, little difficulty in operating, no interference or difficulty interpreting |                                                 |                                                                               |
| Gulec et al., (2011) [6]      | Eating disorder (risk) | Guided website integrated intervention<br>Weekly prompted                                     | Good concept but few rated as helpful |                            | Increase frequency from weekly to daily                                                                                                                            | Only half thought feedback messages appropriate | Wanted more concrete advice from feedback                                     |
| Carrard et al., (2011) [7]    | Eating disorder        | Guided website integrated intervention<br>Daily unclear if prompted                           | Pleasant and useful                   | To understand, to complete |                                                                                                                                                                    | Graphs rated as not helpful                     |                                                                               |
| Carrard et al., (2011) [8]    |                        | Guided website integrated intervention<br>Weekly unclear if prompted                          | Useful                                |                            |                                                                                                                                                                    | Feedback satisfied                              |                                                                               |
| Lindenberg et al., (2011) [9] |                        | Guided website integrated intervention<br>Weekly prompted                                     | Good concept, not helpful             |                            |                                                                                                                                                                    | Feedback not appropriate                        |                                                                               |
| Shapiro et                    |                        | Guided integrated                                                                             | Enjoyment of using                    |                            |                                                                                                                                                                    |                                                 |                                                                               |

|                                    |            |                                                                                                         |                                                                                                                       |                                                   |                                                              |                                                                 |                                                                                                                                                                                      |                                                                                                                                                                                             |                                                                                                                                                                              |
|------------------------------------|------------|---------------------------------------------------------------------------------------------------------|-----------------------------------------------------------------------------------------------------------------------|---------------------------------------------------|--------------------------------------------------------------|-----------------------------------------------------------------|--------------------------------------------------------------------------------------------------------------------------------------------------------------------------------------|---------------------------------------------------------------------------------------------------------------------------------------------------------------------------------------------|------------------------------------------------------------------------------------------------------------------------------------------------------------------------------|
| al., (2010)<br>[10]                |            | face-to-face<br>therapy<br>Daily unprompted                                                             | intervention                                                                                                          |                                                   |                                                              |                                                                 |                                                                                                                                                                                      |                                                                                                                                                                                             |                                                                                                                                                                              |
| Bauer et<br>al., (2006)<br>[11]    |            | Unguided<br>intervention to<br>support discharge<br>Weekly prompted                                     | Most would<br>recommend it or<br>repeat it. Found it<br>triggered time to<br>reflect and were<br>grateful for support |                                                   |                                                              | Most felt that<br>duration was<br>OK but many<br>felt too short | Mostly rated as<br>very or<br>reasonably<br>appropriate<br>messages but a<br>third said rather<br>inappropriate.<br>Commented that<br>feedback too<br>repetitive and<br>standardised |                                                                                                                                                                                             | Most of the<br>participants<br>reported that the<br>lack of personal<br>support bothered<br>them to a certain<br>degree, with<br>some very<br>bothered by lack<br>of contact |
| Robinson<br>et al.,<br>(2006) [12] |            | Guided<br>intervention to<br>support discharge<br>Weekly prompted                                       | Good quality<br>intervention, would<br>not repeat nor<br>recommend                                                    | Little effort.<br>Some loss<br>of<br>instructions | SMS limits<br>answers.<br>Incorrect<br>messages<br>received, | Most<br>satisfied with<br>duration                              | Rated as<br>moderately<br>appropriate;<br>mixed views<br>whether<br>encouraging or<br>patronising                                                                                    | More<br>personalised<br>and<br>constructive<br>responses<br>wanted to<br>improve<br>impact of<br>intervention.                                                                              | Half appreciated<br>lack of personal<br>support, others<br>wanted some<br>contact e.g.<br>Phone call to<br>support                                                           |
| Drake et<br>al.,(2013)<br>[13]     | Depression | Guiding optional<br>(only one third<br>chose to),<br>intervention as a<br>treatment<br>Daily unprompted | Low acceptability,<br>validity of daily and<br>mood descriptors                                                       | To learn,<br>remember,<br>access                  | To learn,<br>remember,<br>access                             | Not too time<br>consuming,<br>but too<br>frequent               | Graphs helpful,<br>automated<br>feedback not as<br>formulaic                                                                                                                         | Some felt<br>insight but<br>most already<br>had this and<br>recommended<br>intervention<br>for new<br>service users<br>to identify<br>mood patterns<br>before or with<br>another<br>therapy | Moderately<br>helpful to have a<br>buddy receiving<br>feedback as<br>received concern<br>and support but<br>experienced guilt<br>about the burden                            |
| Kramer et<br>al.,(2014)<br>[14]    |            | Guided<br>intervention as<br>treatment                                                                  |                                                                                                                       |                                                   |                                                              |                                                                 | Satisfaction with<br>graphs, easy to<br>understand                                                                                                                                   |                                                                                                                                                                                             |                                                                                                                                                                              |

|                                      |                                                   |                                                                                        |                                                                                                       |                                              |                                                                                 |                                                                                                                          |
|--------------------------------------|---------------------------------------------------|----------------------------------------------------------------------------------------|-------------------------------------------------------------------------------------------------------|----------------------------------------------|---------------------------------------------------------------------------------|--------------------------------------------------------------------------------------------------------------------------|
|                                      |                                                   | Multiple times daily<br>random prompts                                                 |                                                                                                       |                                              |                                                                                 |                                                                                                                          |
| Burns et<br>al., (2011)<br>[15]      |                                                   | Guided website<br>integrated<br>intervention<br>Multiple times daily<br>random prompts | Moderate<br>satisfaction                                                                              |                                              |                                                                                 |                                                                                                                          |
| Hetrick et<br>al (2015)<br>[16]      | Moderate<br>Depression                            | Guided<br>intervention<br>Weekly<br>unprompted                                         | Overall acceptable,<br>simple and time it<br>takes acceptable.<br>Not capable of<br>capturing feeling |                                              | Graphs were<br>not shown to<br>patients,<br>would have<br>liked to see<br>them. | Helped to<br>understand<br>symptoms,<br>fluctuation and<br>ability to manage.<br>Some already<br>knew the<br>information |
| Meglic et<br>al., (201)<br>[17]      | Depression,<br>Mixed<br>depression<br>and anxiety | Guided website<br>integrated<br>intervention<br>Weekly prompted if<br>no response      | Overall usefulness.<br>Annoying prompts<br>and repetitive<br>questionnaire                            | Computer<br>literacy<br>required             |                                                                                 | Feedback useful<br>or repetitive and<br>impersonal                                                                       |
| Godelski<br>et al.,<br>(2012) [18]   | Mix<br>(Depression)                               | Guided<br>intervention to<br>support treatment<br>management<br>Daily prompts          |                                                                                                       | Fully or<br>very<br>satisfied<br>with device |                                                                                 | Increased<br>control over<br>disease and<br>improved<br>overview                                                         |
| Granholm<br>et<br>al.,(2012)<br>[19] | Schizophrenia                                     | Guided<br>intervention to<br>support treatment<br>management<br>Daily prompts          | Found text<br>messages helpful<br>(alludes to<br>acceptability of<br>intervention)                    |                                              |                                                                                 | Improved<br>understanding<br>of condition<br>and ability to<br>cope                                                      |
| Smith et<br>al.,(2012)<br>[20]       | PTSD                                              | Guided<br>intervention to<br>support discharge<br>Multiple times<br>weekly prompts     |                                                                                                       |                                              |                                                                                 | Notification of<br>distress was<br>useful                                                                                |

1. Bauer M, Grof P, Gyulai L, Rasgon N, Glenn T, Whybrow PC. Using technology to improve longitudinal studies: self-reporting with ChronoRecord in bipolar disorder. *Bipolar Disord* 2004;6(1):67-74.
2. Foster J, Price J, Budge K, Bell S, Goodwin G, Geddes J. Refining a mood monitoring system for bipolar disorder: user experiences of True Colours [poster abstract]. *Bipolar Disord* 2011;13(s1):45-45.
3. Wenze SJ, Armev MF, Miller IW. Feasibility and Acceptability of a Mobile Intervention to Improve Treatment Adherence in Bipolar Disorder: A Pilot Study. *Behav Modif* 2014;38(4):497-515.
4. Depp CA, Mausbach B, Granholm E, Cardenas V, Ben-Zeev D, Patterson TL, et al. Mobile interventions for severe mental illness: design and preliminary data from three approaches. *J Nerv Ment Dis* 2010;198(10):715-21.
5. Depp CA, Ceglowski J, Wang VC, Yaghouti F, Mausbach BT, Thompson WK, et al. Augmenting psychoeducation with a mobile intervention for bipolar disorder: A randomized controlled trial. *J Affect Disord* 2015;174:23-30.
6. Gulec H, Moessner M, Mezei A, Kohls E, Túry F, Bauer S. Internet-based maintenance treatment for patients with eating disorders. *Prof Psychol Res Pr* 2011;42(6):479-86.
7. Carrard I, Crépin C, Rouget P, Lam T, Martial VdL, Golay A. Acceptance and efficacy of a guided Internet self-help treatment program for obese patients with binge eating disorder. *Clin Pract Epidemiol Ment Health* 2011;7:8-18.
8. Carrard I, Fernandez-Aranda F, Lam T, Nevenon L, Liwowsky I, Volkart A, et al. Evaluation of a guided internet self-treatment programme for bulimia nervosa in several European countries. *Eur Eat Disord Rev* 2011;19(2):138-49.
9. Lindenberg K, Moessner M, Harney J, McLaughlin O, Bauer S. E-health for individualized prevention of eating disorders. *Clin Pract Epidemiol Ment Health* 2011;7:74-83.
10. Shapiro JR, Bauer S, Andrews E, Pisetsky E, Bulik-Sullivan B, Hamer RM, et al. Mobile Therapy: Use of Text-Messaging in the Treatment of Bulimia Nervosa. *Int J Eat Disord* 2010;43(6):513-19.
11. Bauer S, Hagel J, Okon E, Meermann R, Kordy H. SMS in der nachstationären Betreuung von Patientinnen mit Bulimia nervosa [Experience with the application of the short message service (SMS) in the aftercare of patients with bulimia nervosa]. *Psychodynamische Psychotherapie* 2006;5(3):127-36.
12. Robinson S, Perkins S, Bauer S, Hammond N, Treasure J, Schmidt U. Aftercare intervention through text messaging in the treatment of bulimia nervosa—Feasibility pilot. *Int J Eat Disord* 2006;39(8):633-38.
13. Drake G, Csipke E, Wykes T. Assessing your mood online: acceptability and use of Moodscope. *Psychol Med* 2013;43(7):1455-64.
14. Kramer I, Simons CJ, Hartmann JA, Menne-Lothmann C, Viechtbauer W, Peeters F, et al. A therapeutic application of the experience sampling method in the treatment of depression: a randomized controlled trial. *World Psychiatry* 2014;13(1):68-77.
15. Burns MN, Begale M, Duffecy J, Gergle D, Karr CJ, Giangrande E, et al. Harnessing Context Sensing to Develop a Mobile Intervention for Depression. *J Med Internet Res* 2011;13(3).
16. Hetrick SE, Dellosa MK, Simmons MB, Phillips L. Development and pilot testing of an online monitoring tool of depression symptoms and side effects for young people being treated for depression. *Early Interv Psychiatry* 2015;9(1):66-69.

17. Meglic M, Furlan M, Kuzmanic M, Kozel D, Baraga D, Kuhar I, et al. Feasibility of an eHealth service to support collaborative depression care: results of a pilot study. *J Med Internet Res* 2010;12(5).
18. Godleski L, Cervone D, Vogel D, Rooney M. Home telemental health implementation and outcomes using electronic messaging. *J Telemed Telecare* 2012;18(1):17-9.
19. Granholm E, Ben-Zeev D, Link PC, Bradshaw KR, Holden JL. Mobile Assessment and Treatment for Schizophrenia (MATS): A Pilot Trial of An Interactive Text-Messaging Intervention for Medication Adherence, Socialization, and Auditory Hallucinations. *Schizophr Bull* 2012;38(3):414-25.
20. Smith B, Harms WD, Burres S, Korda H, Rosen H, Davis J. Enhancing behavioral health treatment and crisis management through mobile ecological momentary assessment and SMS messaging. *Health Informatics J* 2012;18(4):294-308.
